# Supplementary material for: 14-3-3ε–dependent deubiquitination and translocation of NLRP3 activates the inflammasome during sepsis
Source: JCI journal article supplement (doi:10.1172/jci.insight.192970), 2026-01-01
Supplement: sd1 [file 1]

# 1 **Supplementary Materials and Methods**

## 2 **Cell culture**

3 BMDMs were isolated from the femur and tibia of 4–6-week-old mice and  
4 differentiated into macrophages in DMEM (ThermoFisher, C11995500BT)  
5 supplemented with 10% FBS (GIBCO, 10099-141), 1% penicillin/streptomycin  
6 (Vivacell, C3420-0100), and 30% L929 (from ATCC) cell culture supernatant for 7  
7 days. iBMDMs (from National Institute of Biological Sciences, Beijing, China) and  
8 HEK-293T cells (from ATCC) were cultured in DMEM supplemented with 10% FBS  
9 and 1% penicillin/streptomycin. The cells were cultured in an incubator (Thermo Fisher,  
10 US) at 37 °C and under a 5% CO<sub>2</sub> environment. We acknowledge Dr. Feng Shao  
11 (National Institute of Biological Sciences, Beijing, China) for the generous gifts of  
12 iBMDMs.

## 13 **Bacterial culture**

14 *P. aeruginosa* (ATCC19660) and *S. aureus* (ATCC43300) were cultured in Luria–  
15 Bertani medium overnight, and the bacterial cells were collected by centrifugation at  
16 5000 ×g for 10 min. The bacterial count was estimated by measuring the optical density  
17 (OD) at 600 nm using a NanoDrop2000 spectrophotometer (Thermo Fisher, US; S.A.:  
18  $OD_{600}1.0 = 1 \times 10^9$  CFU/mL; P.A.:  $OD_{600}1.0 = 8 \times 10^8$  CFU/mL). The LB medium was  
19 prepared as follows: 10 g tryptone (Solarbio, T8490), 5 g yeast extract (Solarbio,  
20 Y8030), and 10 g NaCl (Sigma-Aldrich, V90BV020058, 150 mM) were dissolved in 1  
21 L ultrapure water, followed by autoclave sterilization before use.

## 22 **BMDMs Differentiation**

23 Bone marrow-derived macrophages (BMDMs) were generated via standard 7-day  
24 differentiation in complete DMEM supplemented with 30% L929 supernatant (as a

25 source of M-CSF) (1). Briefly, bone marrow was flushed from tibiae and femora of 4-  
26 6-week-old 14-3-3 $\epsilon^{f/f}$  or 14-3-3 $\epsilon^{f/f}$ Ly22 $^{Cre}$  mice using a 1-mL syringe with 25G needle.  
27 Erythrocytes were lysed with RBC lysis solution (Solarbio, China) for 3 min at room  
28 temperature. Nucleated cells were cultured in complete DMEM (10% FBS, 1%  
29 penicillin/streptomycin) supplemented with 30% L929 cell-conditioned medium.  
30 Medium was replaced on day 3 and 5 of differentiation. Mature BMDMs were  
31 harvested on day 7 of differentiation and subsequently used for functional assays.

### 32 **siRNA Transfection in BMDMs**

33 BMDMs were generated by culturing bone marrow cells in 6-well plates containing  
34 L929 cell-conditioned medium, allowing differentiation until reaching approximately  
35 80% confluence. Following differentiation, the medium was exchanged for 1 mL of  
36 fresh BMDM culture medium supplemented with 10% FBS and maintained without  
37 penicillin-streptomycin. Then, 15 $\mu$ L si-NC or si-14-3-3 $\epsilon$  (20  $\mu$ M) was mixed with 15  
38  $\mu$ L INVI DNA RNA transfection reagent (Invigentech, US) and incubated at room  
39 temperature for 15 min. The resulting complexes were then added to BMDMs cultures  
40 and maintained for 24 hours. Next, medium was replaced with fresh medium, and  
41 incubation continued for 24 additional hours. Then the cells were collected for further  
42 experiments. The siRNA target 14-3-3 $\epsilon$  was listed in Supplemental Table 3.

### 43 **Plasmid construction and transient transfection**

44 The cDNA sequences encoding mouse NLRP3 with a C-terminal Flag tag, mouse  
45 NLRP3 with a C-terminal HA tag, mouse NLRP3 with a C-terminal Myc tag, mouse  
46 14-3-3 $\epsilon$  with a C-terminal Flag tag were amplified by reverse transcription PCR. These  
47 fragments were then subcloned into the pcDNA3.1(+) vector following the  
48 manufacturer's protocol (GenScript). NLRP3 lacking the PYD ( $\Delta$ PYD), NACHT

49 ( $\Delta$ NACHT), or LRR ( $\Delta$ LRR) domain were generated by deleting the PYD domain(1-  
50 91Aa), the NACHT domain(136-532Aa), or the LRR domain(739-1033Aa). Segmental  
51 and deletion clones were subcloned from the full-length NLRP3 plasmid. The  
52 mutations of NLRP3 at S194 and S291 were synthesized and constructed by JinsiruiBio  
53 Company (Nanjing, China). Cells were transiently transfected with plasmids or blank  
54 vector using Lipofectamine 2000 (Invitrogen, Thermo Fisher Scientific) as a previously  
55 described (2).

### 56 **Co-IP and western blot analyses**

57 For co-IP, cells were lysed in RIPA lysis buffer (pH 7.4) containing Tris (Fude, FD2010,  
58 50 mM), NaCl (Sigma-Aldrich, V900058, 150 mM), NP-40 (Biosharp, BS205, 1%),  
59 and a protease inhibitor cocktail (Selleck, B14001, 1%) on ice and the lysate was  
60 centrifuged at  $10,000 \times g$  for 10 min at 4 °C. After centrifugation, the supernatant was  
61 incubated overnight at 4 °C with protein A/G beads (Merck Millipore, LSKMAGAG02)  
62 and the corresponding antibodies. The beads were then washed five times with RIPA  
63 buffer and boiled with 5 $\times$ SDS-PAGE loading buffer (Fude, FD002) at 100 °C for 10  
64 min to release the proteins. To detect the exogenous association, HEK-293T cells were  
65 transfected with the indicated plasmids and the cell lysate was incubated overnight at  
66 4 °C with EZview™ Red Anti-HA Affinity Gel (Sigma-Aldrich, E6779), anti-Flag M2  
67 affinity beads (Sigma-Aldrich, M8823), or EZview™ Red Anti-c-myc Affinity Gel  
68 (Sigma-Aldrich, E6654). Western blot analysis was performed according to methods  
69 described in previous studies (3) using the indicated antibodies. Primary and secondary  
70 antibodies were employed with the following specifications: anti-Caspase-1 (p20,  
71 AdipoGen, AG-20B-0042, 1 $\mu$ g/mL); anti-NLRP3 antibody (AdipoGen, AG-20B-0014,  
72 1 $\mu$ g/mL); anti-NLRP3 antibody (Abcam, ab270449, 1 $\mu$ g/mL); anti-IL-1 $\beta$  (R&D,  
73 BAF401, 1 $\mu$ g/mL); anti-14-3-3 $\epsilon$  antibody (Novus, NBP1-89827, 1 $\mu$ g/mL); anti-beta-

74 actin (Cell Signaling Technology, 4970, 1µg/mL); anti-ASC antibody (Cell Signaling  
75 Technology, 67824, 1µg/mL); anti-HA antibody (Cell Signaling Technology, 3724,  
76 1µg/mL); anti-FLAG M2 antibody (Cell Signaling Technology, 14793, 1µg/mL);  
77 anti-Myc antibody (Cell Signaling Technology, 2276, 1µg/mL); anti-GAPDH antibody  
78 (Abcam, ab181602, 1µg/mL); anti-Ubiquitin antibody (Cell Signaling Technology,  
79 43124, 1µg/mL); anti-β-tubulin (Cell Signaling Technology, 2146S, 1µg/mL); anti-Cox-  
80 1 antibody (Cell Signaling Technology, 9896, 1µg/mL); anti-VDAC antibody (Cell  
81 Signaling Technology, 4661, 1µg/mL); anti-mitofusin-2 antibody (Cell Signaling  
82 Technology, 9482, 1µg/mL); anti-Calnexin antibody (Novus, NB100-1965, 1µg/mL);  
83 anti-FACL4 antibody (Abcam, ab205199, 1µg/mL); Goat Anti-Mouse IgG-HRP  
84 Conjug (BIO-RAD, 1706516, 1:2000); Goat Anti-Rabbit IgG-HRP Conjug (BIO-RAD,  
85 1706515, 1:2000).

## 86 **Protein structure prediction and molecular docking**

87 The protein sequences (NLRP3: Q8R4B8; 14-3-3ε: P62259) were obtained from the  
88 UniProt database. The structure prediction of the protein complex was accomplished  
89 using AlphaFold3. The binding free energy of the best conformation was calculated  
90 using the MOE software version 2019.0102. Molecular visualization and residue  
91 interaction analyses were performed using PyMOL version 2.5.5.

## 92 **ELISA**

93 ELISA kit for detecting the levels of 14-3-3ε in human plasma were purchased from  
94 Huayun Biotechnology. ELISA kit for detecting the levels of IL-1β in human plasma  
95 were purchased from Dakewei Biotechnology. ELISA kit for detecting the levels of  
96 mouse IL-1β, IL-1α and LDH were purchased from MEIMIAN. ELISA kit for detecting  
97 the levels of IL-6 in mouse serum were purchased from Thermo Fisher.

98 **qPCR assay**

99 Cells were lysed with TRIzol (ThermoFisher, 15596018) and RNA was isolated and  
100 amplified as previously reported (3, 4). qPCR was performed using GoTaq qPCR  
101 Master Mix (Promega, A6002) on a Bio-Rad CFX96 real-time PCR system (Bio-Rad,  
102 US). The list of primers is included in Supplemental Table 2.

103 **Immunofluorescence staining**

104 For staining HEK-293T cells and BMDMs, the cells were seeded in disposable confocal  
105 dishes and processed accordingly. For ASC speck staining, peritoneal macrophages  
106 were seeded in the wells of 12-well plates with cell climbing slices and stimulated with  
107 LPS (Sigma-Aldrich, L8274, 400 ng/mL) for 5 hours. Thereafter, the cells were  
108 stimulated with Nig (Macklin, N849347, 20  $\mu$ M) for 30 min or left unstimulated. The  
109 cells were fixed with paraformaldehyde and permeabilized using 0.3% Triton X-100  
110 (Biosharp, BS084) in 5% bovine serum albumin (BSA, Biotechnology, BW0332)  
111 solution, and subsequently incubated with the primary antibodies overnight at 4 °C. The  
112 cells were then washed three times with PBS and incubated with the corresponding  
113 secondary antibodies coupled with fluorophores at 37°C for 1 h. The cells were then  
114 stained with DAPI (Solarbio, C0065) for 5 min and viewed using a confocal microscope  
115 (Zeiss LSM 880, Germany). Primary and secondary antibodies were employed with the  
116 following specifications: anti-NLRP3 antibody (Abcam, ab270449, 5 $\mu$ g/mL); anti-  
117 ASC antibody (Cell Signaling Technology, 67824, 5 $\mu$ g/mL); anti-FLAG Tag antibody  
118 (Novus, NBP1-06712SS, 1 $\mu$ g/mL); anti-HA antibody (Cell Signaling Technology,  
119 3724, 5 $\mu$ g/mL); anti-FACL4 antibody (Abcam, ab205199, 5 $\mu$ g/mL); anti-14-3-3 $\epsilon$   
120 antibody (Thermo Fisher Scientific, MA5-49207, 5 $\mu$ g/mL); Goat Anti-Rat IgG H&L  
121 (Alexa Fluor® 594, Abcam, ab150160,1:500); Goat Anti-Rabbit IgG H&L (Alexa  
122 Fluor® 594, Abcam, ab150080,1:500); Goat Anti-Rabbit IgG H&L (Alexa Fluor® 488,

123 Abcam, ab150077,1:500); Goat anti-Mouse IgG (H+L) Cross-Adsorbed Secondary  
124 Antibody Alexa Fluor 594 (Thermo Fisher Scientific, A-11020, 1:500).

### 125 **Inflammasome activation**

126 Induced BMDMs or iBMDMs were seeded at a density of  $5 \times 10^5$  cells/well in 12-well  
127 plates. Once adherent, the culture medium was replaced with Opti-MEM<sup>®</sup> I Reduced  
128 Serum Medium (Thermo Fisher, US). Thereafter, the cells were treated with 200 ng/mL  
129 LPS for 3 h and then were stimulated separately with Nig (10  $\mu$ M) for 30 min or ATP  
130 (TargetMol, T20089, 50  $\mu$ M) for 50 min, or with poly (dAdT, InvivoGen, ttrl-patn, 2  
131  $\mu$ g/mL) transfection for 6 h, or flagelin (Macklin, F879697, 1  $\mu$ M) transfection for 6 h.  
132 The supernatant and whole-cell lysate were collected. The supernatant was mixed with  
133 methanol (Aladdin, M116118) and chloroform (Guangzhou, GSSA02-TD) at a ratio of  
134 4:4:1 to separate the proteins. The mixture was then centrifuged at  $10,000 \times g$  for 15  
135 min at 4  $^{\circ}$ C. The supernatant was discarded, and the pellet was washed three times with  
136 methanol. After drying at room temperature for 15 min, the protein pellet was dissolved  
137 in 50  $\mu$ L RIPA lysis buffer for western blot.

### 138 **ASC oligomer crosslinking**

139 BMDMs were stimulated with LPS (200 ng/mL) for 3 h and stimulated with 20  $\mu$ M  
140 Nig or 50  $\mu$ M ATP for 1 h. The cells were lysed with a Triton-X buffer containing 50  
141 mM Tris-HCl pH 7.5, 150 mM NaCl, 0.5% TritonX-100, and EDTA-free protease  
142 inhibitor cocktail, and the lysate was centrifuged at  $6000 \times g$  for 15 min at 4  $^{\circ}$ C. The  
143 soluble fraction was mixed with 5 $\times$  loading buffer (Fude, FD002) and denatured by  
144 heating at 95  $^{\circ}$ C for 10 min and the insoluble fraction was crosslinked with 2 mM  
145 disuccinimidyl suberate (DSS, Thermo Scientific, 21655) for 30 min at 37  $^{\circ}$ C. After  
146 centrifugation at  $6000 \times g$  for 15 min at 4  $^{\circ}$ C, the crosslinked pellet was obtained and

147 resuspend in Triton-X buffer. The mixture was then mixed with 5× loading buffer and  
148 denatured by heating at 100 °C for 10 min.

#### 149 **SDD-AGE**

150 BMDMs transfected with si-NC or si-14-3-3ε were lysed with a lysis buffer containing  
151 0.5% Triton X-100, 50 mM Tris-HCl, 150 mM NaCl, 10% glycerol (Macklin, G6201),  
152 and 1% protease inhibitor. The cell suspension was homogenized by passing it through  
153 21-gauge needles 20 times and resuspended in 5× sample buffer (0.5× Tris-Borate-  
154 EDTA, TBE, Beyotime, ST718, 10% glycerol, 2% SDS, Acme, 151-21-3, and 0.0025%  
155 bromophenol blue, Macklin, B802654). The lysate was loaded onto a 1.5% agarose gel.  
156 After electrophoresis in the running buffer (1× TBE comprising 89 mM Tris, pH 8.3,  
157 89 mM boric acid, and 2 mM EDTA, Macklin, E809068 and 0.1% SDS) at a stable  
158 voltage of 80 V for 1 h, the proteins were transferred onto a PVDF membrane (Merck  
159 Millipore, IPVH00010) and the membranes were blocked and incubated with anti-  
160 NLRP3 antibody (Abcam, ab270449, 5μg/mL); followed by incubation with HRP-  
161 conjugated secondary antibodies.

#### 162 **Membrane flotation**

163 The membrane flotation experiments were performed according to the previous studies  
164 (5, 6). Briefly, the treated cells were digested and resuspended using 1mL lysis buffer  
165 containing 10mM Tris-HCl (EcoTop Bio, ES-8066); 10mM KCl (Aladdin, P656969),  
166 and 5mM MgCl<sub>2</sub> (Sinopharm, 10012818) and were lysed with a 25-gauge needle and  
167 syringe 20 times and were incubated on ice for 20 min. Cell suspension was centrifuged  
168 at 1,000 × g for 5 min at 4 °C. After centrifugation, the supernatant was mixed with  
169 3mL hypotonic lysis buffer containing 50mM Tris-HCl, 25mM KCl, 5mM MgCl<sub>2</sub>, and  
170 72% sucrose (Macklin, S818049). Subsequently, 4 mL of hypotonic lysis buffer

171 containing 55% sucrose and 1.5 mL of hypotonic lysis buffer containing 10% sucrose  
172 were slowly added to obtain a delaminated mixture. Samples were centrifuged at 38000  
173 rpm for 14 hours at 4 °C. After centrifugation, gradients were fractionated from the top  
174 into 8 equal fractions (about 1.2mL/fraction). 0.8mL of hypotonic lysis buffer was  
175 added to every fraction and the mixture was concentrated by ultrafiltration tubes  
176 (Beyotime, FUF051) for western blot.

### 177 **Organelle isolation**

178 The organelle isolation experiments were performed according to the previous studies  
179 (7, 8). Briefly, the treated cells were digested and resuspended using a lysis buffer 1  
180 containing 225mM D-mannitol (Beyotime, ST2362), 75mM sucrose, 0.1mM EDTA  
181 (Macklin, E809068), 30mM Tris-HCl; and were lysed with a 25-gauge needle and  
182 syringe 20 times. The homogenate was centrifuged at  $600 \times g$  for 5 min to remove  
183 unbroken cells. Then the supernatant was centrifuged at  $7,000 \times g$  for 10 min, and the  
184 cell supernatant (S1) and pellet (P1) were collected. The supernatant (S1) was incubated  
185 on ice for 1.5 hours and was centrifuged at  $20,000 \times g$  for 30 min, then the new  
186 supernatant was then transferred to new tubes and ultracentrifuged at  $100,000 \times g$  for 1  
187 hour at 4 °C to collect ER (pellet) and cytosol (supernatant). The pellet (P1) were  
188 washed twice times with the lysis buffer 1 and resuspended in a lysing buffer 2  
189 containing 250mM D-mannitol, 5mM HEPES (Sigma-Aldrich, 7365-45-9), 0.5mM  
190 EDTA. This mixture was added on top of percoll medium (Sigma-Aldrich, P4937)  
191 containing 250mM D-mannitol, 25mM HEPES, 1mM EDTA, 30% percoll, then lysing  
192 buffer 2 was added to the upper layer. After centrifugation at  $95,000 \times g$  for 30 min, the  
193 liquid was divided into three layers. The middle-layer and lower-layer liquid were  
194 collected and mixed with lysing buffer 2. The middle-layer mixture was centrifuged at  
195  $100,000 \times g$  for 1 hour, the precipitated were collected and extracted as MAMs fraction.

196 The lower-layer mixture was centrifuged at 6,300×g for 10 min,  
197 the resulting precipitate was the mitochondrial fraction.

### 198 **CLP mouse model**

199 The mice were anesthetized with pentobarbital via intraperitoneal injection. The mice  
200 were fixed, with abdomen facing upwards, and the abdomen was disinfected with 75%  
201 alcohol. A longitudinal midline incision was made using a scalpel to expose the cecum,  
202 which is located on the left side of the abdomen. The cecum was ligated midway  
203 between the distal pole and the cecum base, followed by one needle puncture. A few  
204 fecal pellets were squeezed out of the perforation sites, the cecum was returned to the  
205 abdomen, and the incision was closed with sutures and skin staples. For the sham  
206 surgery, cecal ligation, cecal perforation, and fecal extrusion were omitted. After 24 h,  
207 serum was collected for biochemical detection using an automatic biochemical analyzer,  
208 the lung sections were used for H&E staining, cells in peritoneal lavage were collected  
209 for flow cytometric analysis, and PET and CT were performed using a nanoScan  
210 PET/CT 82s scanner.

### 211 **Flow cytometry**

212 Flow cytometry was performed as previously described (4). Mouse peritoneal lavage  
213 fluid was centrifuged at 800 ×g for 5 min to obtain cell pellets. Human peripheral blood  
214 neutrophils and monocytes were isolated using a human peripheral blood neutrophil  
215 isolation kit (Solarbio, P9040). For surface molecule staining, cells were blocked with  
216 PBS containing 1% BSA, stained with the corresponding fluorescent antibody, washed,  
217 and fixed with a 1% paraformaldehyde solution (Biosharp, BL539A30525-89-4). For  
218 14-3-3ε staining, the cells were fixed with a IC Fixation Buffer (Invitrogen, 00-8222-  
219 49) and permeabilized using a permeabilization buffer (Invitrogen, 00-8333-56) after

220 the surface molecules were stained. Subsequently, cells were stained with 14-3-3e  
221 antibody (Invitrogen, MA5-49207, 1µg/mL) at 4 °C for 30 min. After washing, cells  
222 were stained with a PE-conjugated secondary antibody (Southern Biotech, 114409) for  
223 30 min and fixed with a 1% paraformaldehyde solution. All flow cytometric assays  
224 were performed using a Cyto-FLEX Flow cytometer (BECKMAN COULTER Life  
225 Sciences, US). Antibodies were employed with the following specifications: APC anti-  
226 mouse F4/80 (BioLegend, 123115); FITC anti-mouse/human CD11b (BioLegend,  
227 101206); PE anti-mouse I-A/I-E (BioLegend, 107608); PE/Cyanine7 anti-mouse Ly-  
228 6G (BioLegend, 127618), APC anti-Mouse CD11c(Proteintech, APC-65130). Pacific  
229 Blue anti-human CD14 (BioLegend, 325615); APC-Cy7 anti-human CD16 (BD,  
230 560248); PE/Cyanine7 anti-human CD15 (BioLegend, 323029); PE anti-mouse  
231 IgG2b(BioLegend, 406708).

### 232 **Plate count to evaluate phagocytosis and intracellular killing of P.A.**

233 BMDMs were differentiated using L929 supernatant and then infected with P. A. at an  
234 MOI of 25. Cells in the BV02 treatment group were pretreated with 5 µg/mL BV02 for  
235 4 hours prior to infection. After 1 hour of infection, gentamicin (300µg/mL) was added  
236 to the culture medium and incubated for 30 min to eliminate extracellular bacteria.  
237 Subsequently, cells were washed three times with PBS to remove extracellular P. A.,  
238 followed by lysis with 0.1% Triton X-100. The number of phagocytosed viable bacteria  
239 was quantified using colony counting assays. The phagocytosis efficiencies were  
240 quantified as colony-forming units (CFU) per cell [CFU (1 h)]. To determine the  
241 intracellular bactericidal activity against P. A., extracellular bacteria were removed 1  
242 hour by gentamicin treatment. After an additional 1-hour incubation, cells were lysed  
243 and plated for colony counting assays to quantify viable bacteria, with results expressed  
244 as CFU per cell [CFU (2h)]. The intracellular killing rate was determined by the

245 following formula: Intracellular bacterial killing = [CFU (1 h) – CFU (2 h)]/CFU  
246 (1 h) × 100%.

247 **IC50 assay**

248 IC50 assay was performed by detecting LDH release into culture supernatants. In brief,  
249 BMDMs were seeded into a 6-well plate at a density of  $5 \times 10^5$  cells per well. Then,  
250 BV02 was diluted with fresh medium at a gradient concentration of 0, 0.5, 1.0, 1.5 and  
251 2.0  $\mu$ M, and added into the cells. Following 12 hours LPS and Nig stimulation,  
252 supernatants were centrifuged (4000  $\times$ g, 5 min) and assayed for LDH activity using  
253 ELISA. The highest LDH concentration was set to 100% for each experiment, and other  
254 concentrations are normalized relative to this value. The IC50 value was calculated by  
255 GraphPad Prism 8.0 (GraphPad Software, San Diego, CA, USA).

256

257

258 **Supplementary Figures**

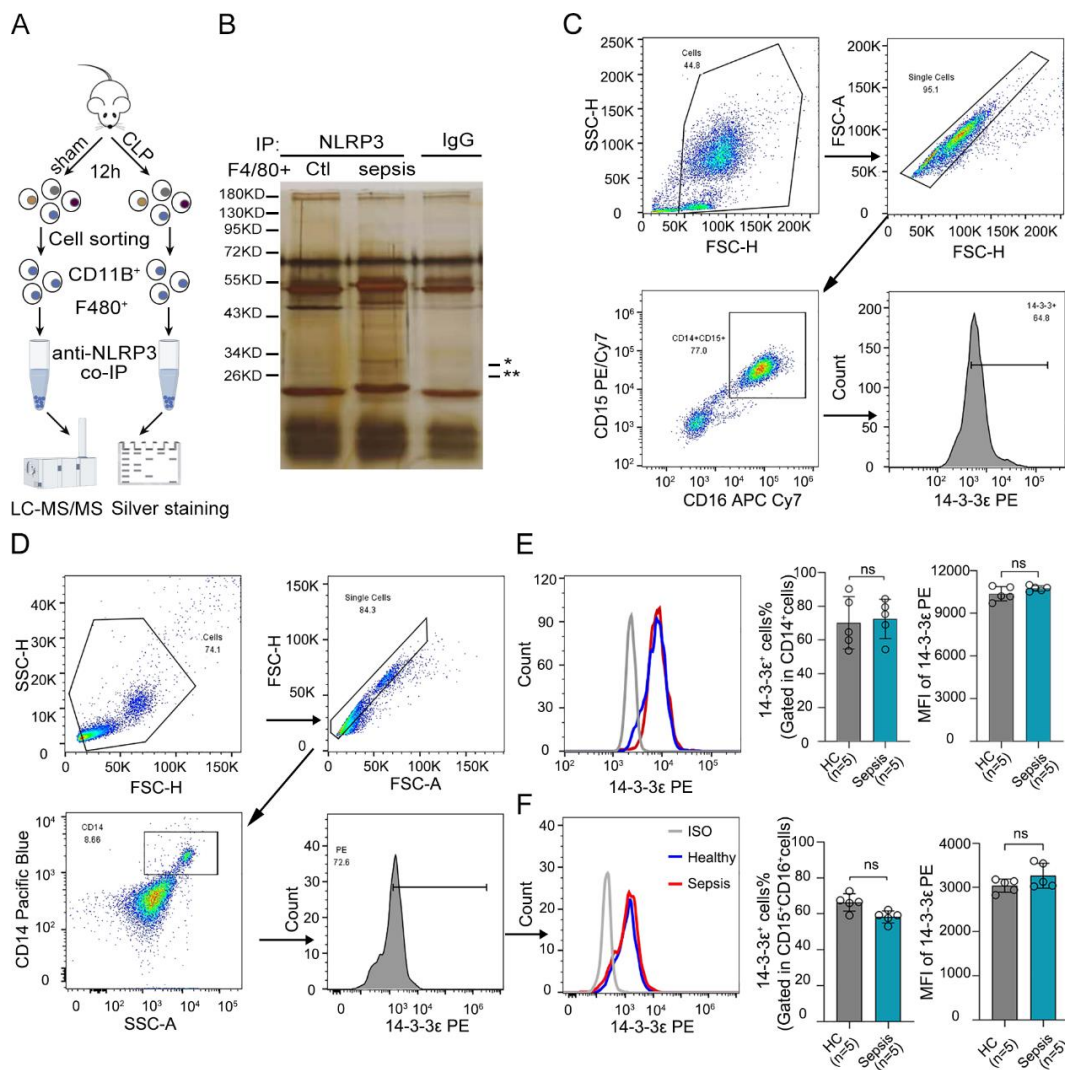

259

260 **Supplemental Figure 1. Expression levels of 14-3-3ε in sepsis.** (A) The flowcharts of

261 LC-MS/MS analysis and silver staining. (B) The representative silver-stained gel

262 image of silver staining, differential bands are marked by asterisk (\*). (C, D) Gating

263 strategy for 14-3-3ε expression in CD15<sup>+</sup>CD16<sup>+</sup> neutrophils and CD14<sup>+</sup> monocytes

264 from peripheral blood of healthy controls and patients with sepsis. (E, F) The

265 percentage of 14-3-3ε-positive cells, mean fluorescence intensity (MFI) of 14-3-3ε, and

266 representative 14-3-3ε expression histograms in neutrophils and monocytes from

267 peripheral blood of healthy controls (n=5) and patients with sepsis (n=5). Data are

268 presented as mean  $\pm$ SD and were analyzed using unpaired Student's t-test (E, F). ns,  
 269 nonsignificant.

270  
 271

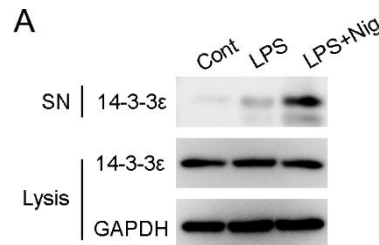

272

273 **Supplemental Figure 2. The expression level of 14-3-3ε in cell culture supernatants.**

274 (A) Western blot analysis of 14-3-3ε expression levels in the supernatants of BMDMs  
 275 treated with LPS alone or LPS combined with Nig.

276

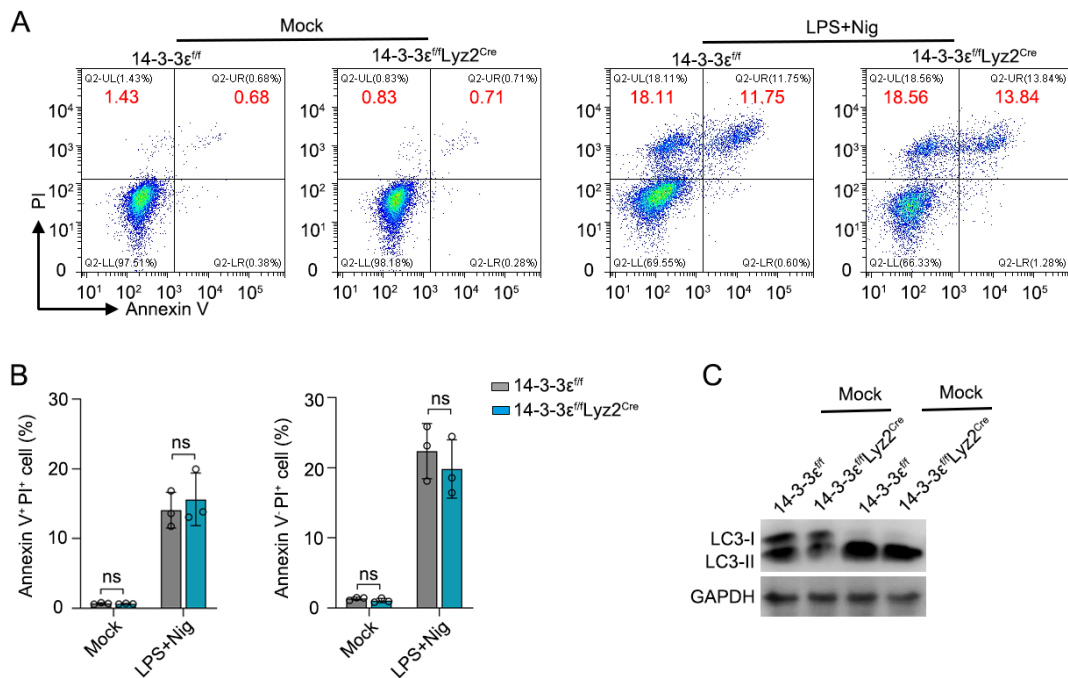

277

278 **Supplemental Figure 3. 14-3-3ε did not affect macrophage apoptosis, necrosis, or**  
 279 **autophagy under LPS and Nig treatment.** (A) Representative flow cytometry plots

280 of Annexin V/PI staining in LPS and Nig-treated 14-3-3ε<sup>f/f</sup> and 14-3-3ε<sup>f/f</sup>Lyz2<sup>Cre</sup>

281 BMDMs. (B) Quantitative analysis of cell apoptotic and necrotic cell populations. (C)

282 Representative Western blot images of LC3 in LPS and Nig-treated 14-3-3<sup>fl/fl</sup> and 14-3-  
283 3<sup>fl/fl</sup>Ly2<sup>Cre</sup> BMDMs. Data are presented as mean  $\pm$ SD and were analyzed using two-  
284 way ANOVA with Tukey's multiple-comparison test (A). ns, nonsignificant.  
285

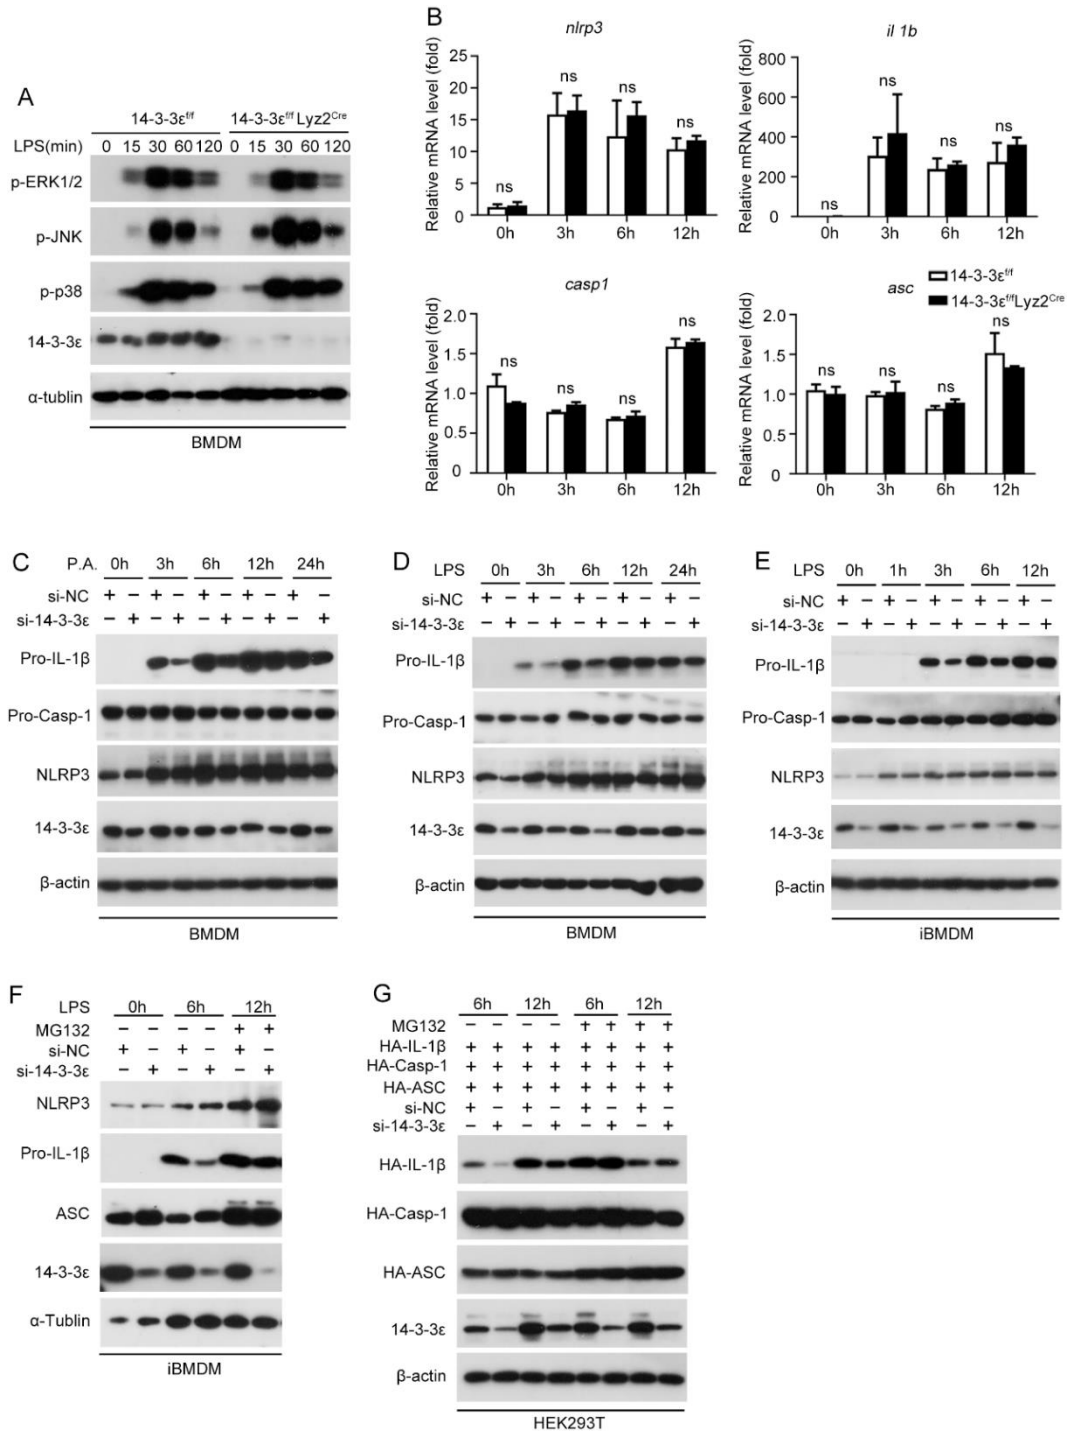

286

287 **Supplemental Figure 4. 14-3-3ε does not affect NLRP3 protein levels but promotes**

288 **IL-1β expression via inhibiting ubiquitin-mediated degradation.** (A) Western blot

289 analysis of phosphorylated signaling molecules of the MAPKs signaling pathways in

290 BMDMs from 14-3-3<sup>fl/fl</sup> or 14-3-3<sup>fl/fl</sup> Lyz2<sup>Cre</sup> mice after stimulation with LPS for the

291 indicated time periods. (B) The mRNA levels of *nlrp3*, *il1b*, *caspase1*, and *asc* in

292 BMDMs from 14-3-3 $\epsilon^{f/f}$  mice or 14-3-3 $\epsilon^{f/f}$ Lyz2<sup>Cre</sup> mice and treated with LPS for  
 293 different time points. (C) Western blot analysis of 14-3-3 $\epsilon$ , NLRP3, pro-IL-1 $\beta$ , and pro-  
 294 caspase1 in si-NC- or si-14-3-3 $\epsilon$ -transfected BMDMs with P.A. infection at the  
 295 indicated time points. (D, E) Western blot analysis of 14-3-3 $\epsilon$ , NLRP3, pro-IL-1 $\beta$ , and  
 296 pro-casp-1 in si-NC- or si-14-3-3 $\epsilon$ -transfected BMDMs and iBMDMs with LPS  
 297 treatment at the indicated time points. (F) Western blot analysis of 14-3-3 $\epsilon$ , NLRP3,  
 298 pro-IL-1 $\beta$ , pro-casp-1 in si-NC- or si-14-3-3 $\epsilon$ -transfected iBMDMs with LPS treatment  
 299 at the indicated time points following MG132 treatment. (G) Western blot analysis of  
 300 14-3-3 $\epsilon$ , NLRP3, pro-IL-1 $\beta$ , pro-casp-1 in si-NC- or si-14-3-3 $\epsilon$ -transfected HEK-293T  
 301 cells, which were transfected with HA-tagged IL-1 $\beta$ , caspase 1, and ASC and treated  
 302 with MG132. Data are presented as mean $\pm$ SD and were analyzed using two-way  
 303 ANOVA with Tukey's multiple-comparison test (B). ns, nonsignificant.  
 304

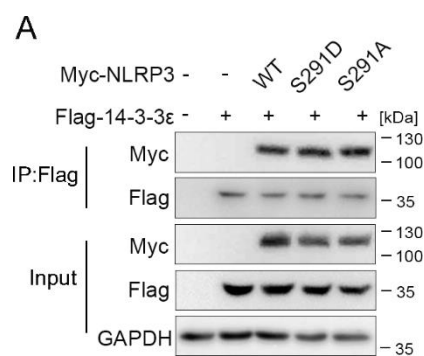

305  
 306 **Supplemental Figure 5. 14-3-3 $\epsilon$ -NLRP3 interaction does not depend on NLRP3**  
 307 **phosphorylation at S291 position.** (A) Co-IP analysis of the interaction between 14-  
 308 3-3 $\epsilon$  and S291A/S291D NLRP3 proteins in HEK-293T cells by transfecting with the  
 309 expression plasmids corresponding to the indicated proteins.  
 310

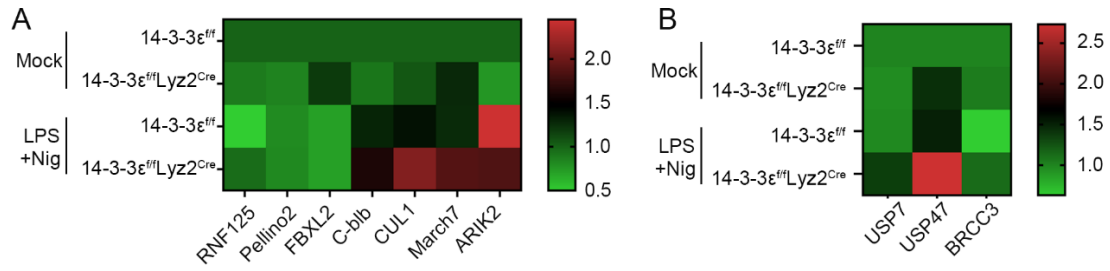

311

312 **Supplemental Figure 6. RNA expression levels of ubiquitin and de-ubiquitin**

313 **ligases.** BMDMs from 14-3-3ε<sup>ff/ff</sup> mice or 14-3-3ε<sup>ff/ff</sup>Lyz2<sup>Cre</sup> mice were primed with LPS

314 and stimulated with Nig, and the RNA expression levels of indicated (A) ubiquitin

315 ligases and (B) de-ubiquitin ligases were detected by q-PCR.

316

317

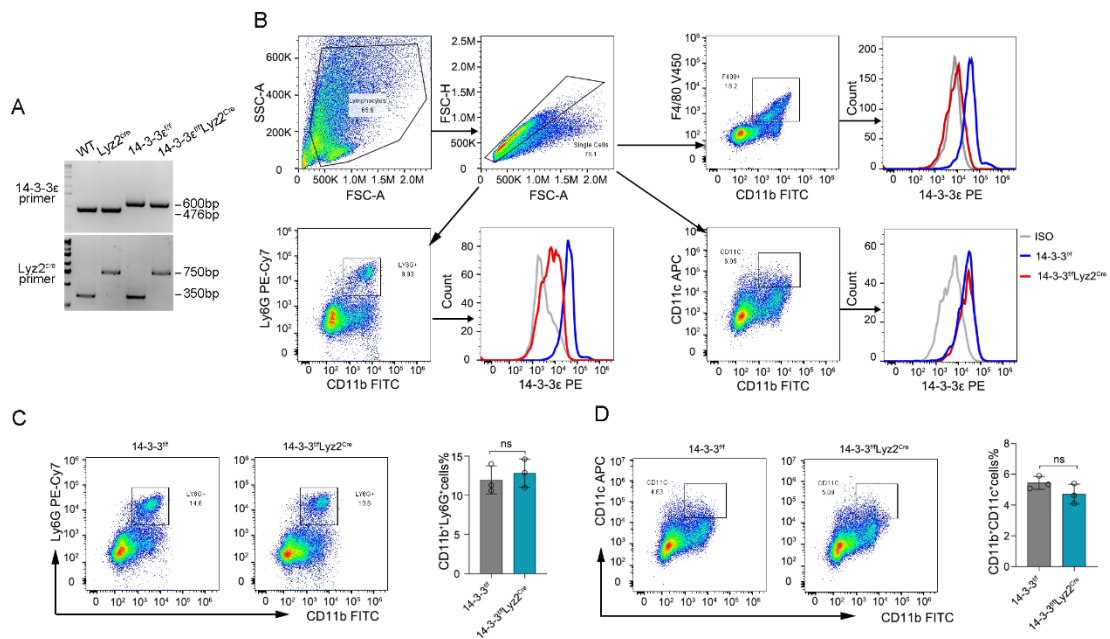

318

319 **Supplemental Figure 7. 14-3-3ε<sup>ff/ff</sup>Lyz2<sup>Cre</sup> conditional knockout did not affect the**

320 **recruitment of neutrophils and DCs into peritoneal cavities of septic mice. (A)**

321 Genotypes of WT, Lyz2<sup>Cre</sup>, 14-3-3ε<sup>ff/ff</sup> and 14-3-3ε<sup>ff/ff</sup>Lyz2<sup>Cre</sup> mice were detected by PCR

322 amplification on genomic DNA extracted from mouse tails. (B) Flow cytometric

323 analysis of 14-3-3ε expression levels in peritoneal macrophages (CD11b<sup>+</sup>F4/80<sup>+</sup>),

324 neutrophils(CD11b<sup>+</sup>LY6G<sup>+</sup>), and DCs (CD11b<sup>+</sup>CD11c<sup>+</sup>) from CLP-modeled 14-3-3ε<sup>f/f</sup>  
325 and 14-3-3ε<sup>f/f</sup>Lyz2<sup>Cre</sup> mice. (C, D) Flow cytometry analysis of the proportions of  
326 neutrophil(CD11b<sup>+</sup>LY6G<sup>+</sup>) and DCs (CD11b<sup>+</sup>CD11c<sup>+</sup>) in peritoneal lavage fluid from  
327 CLP-modeled mice. Data are presented as mean ±SD and were analyzed using unpaired  
328 Student's t-test (C, D). ns, nonsignificant.

329

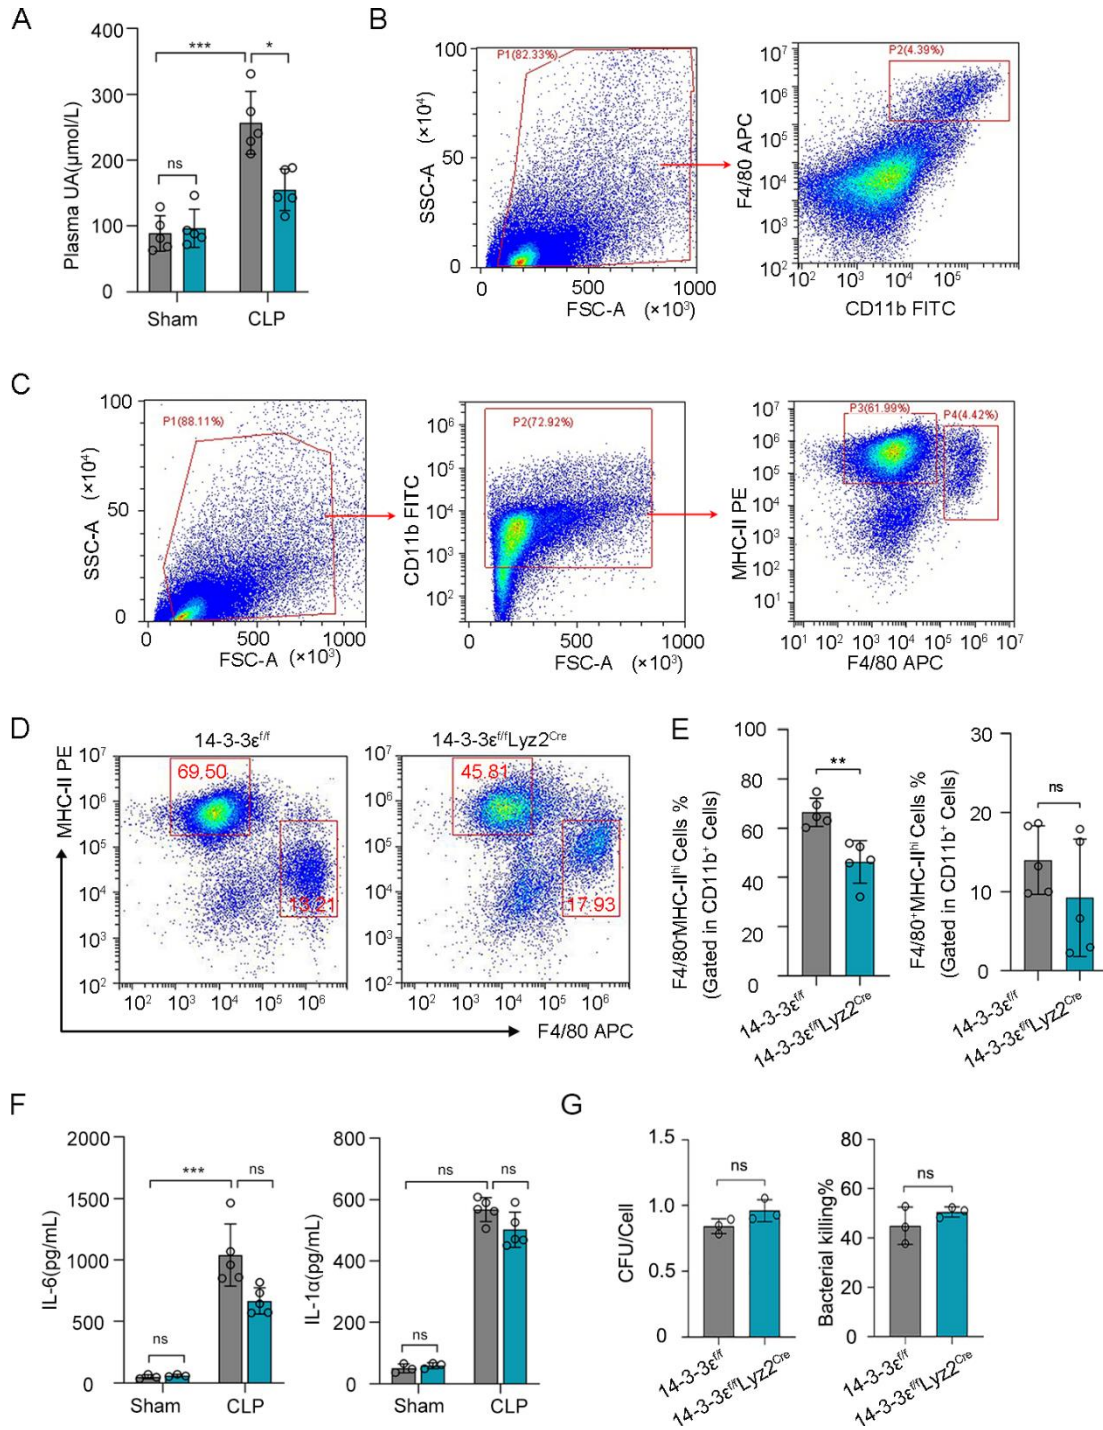

330

331 **Supplemental Figure 8. 14-3-3 $\epsilon^{fl/fl}$ Lyz2<sup>Cre</sup> conditional knockout reduced small**

332 **peritoneal macrophages. (A) UA in mice serum after 24 h of sham or CLP surgery**

333 **was quantified using an automated biochemistry analyzer. (B) The gating strategy for**

334 **macrophage (CD11b<sup>+</sup>F4/80<sup>+</sup>). (C) The gating strategy for large peritoneal macrophages**

335 **(F4/80<sup>hi</sup>MHC-II<sup>lo</sup>) and small peritoneal macrophages (F4/80<sup>lo</sup>MHC-II<sup>hi</sup>).** (D, E) Flow

336 cytometric analysis of large peritoneal macrophages and small peritoneal macrophages  
337 from the peritoneal cavity after 24 h of sham or CLP surgery. (F) IL-6 and IL-1 $\alpha$  levels  
338 in mouse serum were measured by ELISA. (G) Efficiency of phagocytosis and  
339 intracellular killing of P. A. by BMDMs from 14-3-3 $\epsilon^{f/f}$  mice or 14-3-3 $\epsilon^{f/f}$ Lyz2<sup>Cre</sup> mice.  
340 Data are presented as mean $\pm$ SD and were analyzed using two-way ANOVA with  
341 Tukey's multiple-comparison test (A, F) and unpaired Student's t-test (E, G). ns,  
342 nonsignificant; \*p<0.05; \*\*p<0.01; \*\*\*p<0.001.  
343

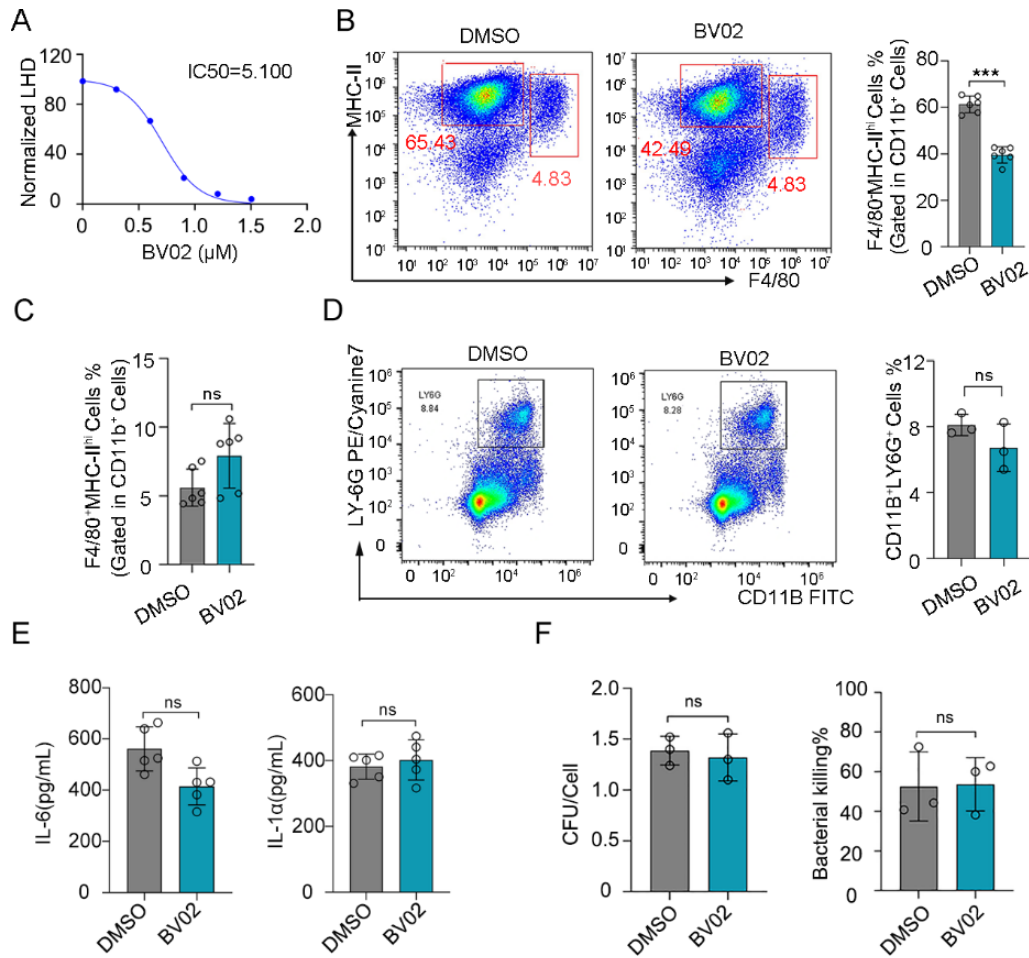

344

345 **Supplemental Figure 9. BV02 treatment reduced small peritoneal macrophages**

346 **but did not affect bacterial phagocytosis.** (A) BV02 concentration–inhibition curves

347 obtained for LDH release in BMDMs treated with LPS and Nig; BV02 IC50 was

348 5.1  $\mu\text{M}$ . (B–D) Mice were treated with BV02 or DMSO (n=5 per group) at 12 h post-

349 CLP, and peritoneal cells were analyzed 12 h after injection. Flow cytometry analysis

350 of (B, C) large peritoneal macrophages and small peritoneal macrophages and (D)

351 neutrophils (CD11b<sup>+</sup>Ly6G<sup>+</sup>). (E) IL-6 and IL-1 $\alpha$  levels in mouse serum were measured

352 by ELISA. (F) Efficiency of phagocytosis and intracellular killing of P. A. by DMSO

353 treated- or BV02 treated- BMDMs. Data are presented as mean  $\pm$ SD and were analyzed

354 using unpaired Student's t-test (B–F). ns, nonsignificant; \*\*\*p<0.001.

355 **Supplemental Table1.** Top 20 bonded proteins in mass spectrometry analysis.

| No. | Accession | -10lgP | Area<br>N3Mock | Area<br>N3Sepsis | #Peptides | Avg.<br>Mass | Gene    |
|-----|-----------|--------|----------------|------------------|-----------|--------------|---------|
| 1   | Q8R4B8    | 259.94 | 1.07E+08       | 1.89E+08         | 28        | 118275       | Nlrp3   |
| 2   | P48678    | 232.48 | 1.72E+07       | 2.17E+07         | 18        | 74238        | Lmna    |
| 3   | P35700    | 231.81 | 1.13E+08       | 1.10E+08         | 14        | 22176        | Prdx1   |
| 4   | Q8VDD5    | 227.9  | 8.68E+06       | 4.62E+06         | 29        | 226370       | Myh9    |
| 5   | P20029    | 223.12 | 6.16E+07       | 7.81E+07         | 14        | 72422        | Hspa5   |
| 6   | P62259    | 217.96 | 5.38E+07       | 6.83E+07         | 14        | 29174        | Ywhae   |
| 7   | P38647    | 206.3  | 2.37E+07       | 3.80E+07         | 12        | 73461        | Hspa9   |
| 8   | E9Q555    | 203.64 | 9.67E+06       | 1.02E+07         | 23        | 584265       | Rnf213  |
| 9   | P29341    | 199.27 | 1.84E+07       | 2.05E+07         | 13        | 70671        | Pabpc1  |
| 10  | O70133    | 197.01 | 3.18E+06       | 6.24E+06         | 11        | 149474       | Dhx9    |
| 11  | P52480    | 192.76 | 2.67E+07       | 2.82E+07         | 12        | 57845        | Pkm     |
| 12  | Q99P91    | 191.89 | 2.57E+07       | 1.95E+07         | 8         | 63676        | Gpnmb   |
| 13  | Q8VDP4    | 188.62 | 1.61E+07       | 1.66E+07         | 10        | 103002       | Ccar2   |
| 14  | P62960    | 184.96 | 8.93E+06       | 1.14E+07         | 5         | 35730        | Ybx1    |
| 15  | P62908    | 182.33 | 2.19E+07       | 3.06E+07         | 9         | 26674        | Rps3    |
| 16  | P54987    | 182.06 | 1.19E+07       | 2.08E+07         | 9         | 53759        | Acod1   |
| 17  | Q03265    | 178.72 | 8.85E+06       | 1.24E+07         | 10        | 59753        | Atp5f1a |
| 18  | Q9JKF1    | 176.96 | 4.39E+06       | 5.49E+06         | 9         | 188741       | Iqgap1  |
| 19  | P99024    | 176.6  | 2.30E+06       | 2.06E+06         | 9         | 49671        | Tubb5   |
| 20  | P63017    | 175.27 | 6.58E+06       | 8.55E+06         | 10        | 70871        | Hspa8   |

356

357

**Supplemental Table 2** The characteristics of healthy controls and sepsis patients

| Variables                        | Healthy controls   | Sepsis Patients     |
|----------------------------------|--------------------|---------------------|
| Sample size (no.)                | 29                 | 60                  |
| Sex-no. (%)                      |                    |                     |
| Male                             | 15 (51.72)         | 30 (50)             |
| Female                           | 14 (48.28)         | 30 (50)             |
| Age (years)                      |                    |                     |
| Mean $\pm$ SD                    | 62.69 $\pm$ 11.42  | 66.65 $\pm$ 14.44   |
| Median (IQR)                     | 61.0 (54, 70)      | 68.0(59.75, 72.25)  |
| Range                            | 42-90              | 21-96               |
| Blood cells                      |                    |                     |
| Platelets ( $\times 10^9$ / L)   | 257.83 $\pm$ 53.16 | 184.53 $\pm$ 148.49 |
| Granulocyte ( $\times 10^9$ / L) | 6.43 $\pm$ 1.37    | 16.37 $\pm$ 7.83    |
| Lymphocyte ( $\times 10^9$ / L)  | 2.11 $\pm$ 0.60    | 0.65 $\pm$ 0.27     |
| Serum biochemical indexes        |                    |                     |
| Fibrinogen (g/L)                 | 3.81 $\pm$ 0.72    | 5.03 $\pm$ 1.57     |
| CRP (mg/L)                       | /                  | 149.39 $\pm$ 91.54  |
| ALT (U/L)                        | 17.96 $\pm$ 9.93   | 55.9 $\pm$ 84.32    |
| Urea (mmol/L)                    | 6.03 $\pm$ 5.41    | 12.55 $\pm$ 8.93    |
| PT (s)                           | 13.27 $\pm$ 1.49   | 18.20 $\pm$ 9.4     |

359 Abbreviations: CRP, C-reactive protein; PT, prothrombin time; ALT, alanine

360 aminotransferase. All data are shown as Mean  $\pm$  SD.

361 **Supplemental Table3 Sequences of q-PCR primers and siRNA.**

| Primer                            | Sequence                  |
|-----------------------------------|---------------------------|
| Primer: <i>nlrp3</i> Forward      | TCACAACCTCGCCCAAGGAGGAA   |
| Primer: <i>nlrp3</i> Reverse      | AAGAGACCACGGCAGAAGCTAG    |
| Primer: <i>il-1b</i> Forward      | TGGACCTTCCAGGATGAGGACA    |
| Primer: <i>il-1b</i> Reverse      | GTTCATCTCGGAGCCTGTAGTG    |
| Primer: <i>caspase1</i> Forward   | GGCACATTTCCAGGACTGACTG    |
| Primer: <i>caspase1</i> Reverse   | GCAAGACGTGTACGAGTGGTTG    |
| Primer: <i>asc</i> Forward        | CTGCTCAGAGTACAGCCAGAAC    |
| Primer: <i>asc</i> Reverse        | CTGTCCTTCAGTCAGCACACTG    |
| Primer: <i>beta actin</i> Forward | GATTACTGCTCTGGCTCCTAGC    |
| Primer: <i>beta actin</i> Reverse | GACTCATCGTACTCCTGCTTGC    |
| 14-3-3ε-siRNA                     | UGUACAUCCAGAAUGUCACAACAGA |

362

363 **References**

- 364 1. Ming S, Li X, Xiao Q, Qu S, Wang Q, Fang Q, et al. TREM2 aggravates sepsis by inhibiting  
365 fatty acid oxidation via the SHP1/BTK axis. *J Clin Invest.* 2024;135(1).
- 366 2. Wu Y, Wang Q, Li M, Lao J, Tang H, Ming S, et al. SLAMF7 regulates the inflammatory  
367 response in macrophages during polymicrobial sepsis. *The Journal of clinical investigation.*  
368 2023;133(6).
- 369 3. Li X, Zhou G, Sun X, Qu S, Lai H, Wu Y, et al. NLRP12 Senses the SARS-CoV-2 Membrane  
370 Protein and Promotes an Inflammatory Response. *J Infect Dis.* 2024;229(3):660-70.
- 371 4. Li X, Dong Z, Liu Y, Song W, Pu J, Jiang G, et al. A Novel Role for the Regulatory Nod-Like  
372 Receptor NLRP12 in Anti-Dengue Virus Response. *Front Immunol.* 2021;12:744880.
- 373 5. MM LHHKKJ. SYNCRIP (synaptotagmin-binding, cytoplasmic RNA-interacting protein) is a  
374 host factor involved in hepatitis C virus RNA replication. *Virology.* 2009;386(2).
- 375 6. Liu HM, Loo YM, Horner SM, Zornetzer GA, Katze MG, and Gale M, Jr. The mitochondrial  
376 targeting chaperone 14-3-3ε regulates a RIG-I translocon that mediates membrane association  
377 and innate antiviral immunity. *Cell Host Microbe.* 2012;11(5):528-37.

378 7. Zhou R, Yazdi AS, Menu P, and Tschopp J. A role for mitochondria in NLRP3 inflammasome  
379 activation. *Nature*. 2011;469(7329):221-5.

380 8. Wieckowski MR, Giorgi C, Lebedzinska M, Duszynski J, and Pinton P. Isolation of  
381 mitochondria-associated membranes and mitochondria from animal tissues and cells. *Nat*  
382 *Protoc*. 2009;4(11):1582-90.

383
